# Supplementary material for: Impact of Age of Onset on Survival after Hepatectomy for Patients with Colorectal Cancer Liver Metastasis: A Real-World Single-Center Experience
Source: MDPI journal article supplement (doi:10.3390/curroncol29110666), 2022-11-06
Supplement: s1 [file s1]

Supplementary Material

# Impact of Age of Onset on Survival after Hepatectomy for Patients with Colorectal Cancer Liver Metastasis: A Real-World Single-Center Experience

Hong-Wei Wang, Li-Jun Wang, Ke-Min Jin, Quan Bao, Juan Li, Si-Kai Ge, Kun Wang and Bao-Cai Xing

**Table S1.** Univariate and multivariable Cox regression analysis of overall survival in the entire cohort.

|                                        | Univariate        |          | Multivariate     |          |
|----------------------------------------|-------------------|----------|------------------|----------|
|                                        | HR (95% CI)       | <i>p</i> | HR (95% CI)      | <i>p</i> |
| Age group                              |                   |          |                  |          |
| EOCRLM                                 | Ref               |          |                  |          |
| IOCRLM                                 | 0.75(0.60-0.95)   | 0.016    | 0.78 (0.60-0.96) | 0.019    |
| LOCRLM                                 | 1.05(0.67-1.34)   | 0.951    |                  |          |
| Female gender                          | 0.81 (0.68-0.96)  | 0.017    | 0.87 (0.73-1.05) | 0.140    |
| Primary tumor location                 |                   |          |                  |          |
| Left-sided primary                     | Ref               |          |                  |          |
| Right-sided primary                    | 1.33 (1.08-1.64)  | 0.001    | 1.13 (0.91-1.40) | 0.273    |
| Primary tumor stage                    |                   |          |                  |          |
| T1 & T2                                | Ref               |          |                  |          |
| T3 & T4                                | 1.18 (0.87-1.60)  | 0.290    | -                |          |
| Lymph Node metastasis                  | 1.40 (1.15-1.69)  | 0.000    | 1.32 (1.08-1.60) | 0.006    |
| Preoperative chemotherapy              | 1.10 (0.90-1.34)  | 0.351    |                  |          |
| CEA >20 ng/dl                          | 1.75 (1.46-2.08)  | 0.000    | 1.55 (1.29-1.86) | 0.000    |
| Synchronous liver metastases           | 1.10 (0.92-1.30.) | 0.293    | -                |          |
| >1 liver metastasis                    | 1.43 (1.18-1.72)  | 0.000    | 1.35 (1.06-1.72) | 0.016    |
| Maximum tumor size ≥ 5cm               | 1.55 (1.31-1.63)  | 0.000    | 1.42 (1.19-1.70) | 0.000    |
| Bilateral liver disease                | 1.35 (1.14-1.60)  | 0.000    | 1.08 (0.87-1.35) | 0.471    |
| RAS stasus                             |                   |          |                  |          |
| Wild-type tumors                       | Ref               |          | Ref              |          |
| Mutated                                | 1.95 (1.65-2.32)  | 0.000    | 1.88 (1.58-2.24) | 0.000    |
| BRAF status                            |                   |          |                  |          |
| Wild-type tumors                       | Ref               |          |                  |          |
| Mutated                                | 1.04(0.39-2.78)   | 0.941    |                  |          |
| Extrahepatic disease                   | 1.88 (1.53-2.32)  | 0.000    | 1.84 (1.49-2.27) | 0.000    |
| Major resection                        | 1.50 (1.23-1.82)  | 0.000    | 1.29 (1.05-1.58) | 0.014    |
| Red Blood Cell Transfusion             | 1.44 (1.09-1.92)  | 0.011    | 1.11 (0.83-1.50) | 0.414    |
| R1 resection                           | 1.29 (1.07-1.57)  | 0.009    | 1.31 (1.08-1.60) | 0.007    |
| Adjuvant chemotherapy                  | 0.67 (0.56-0.80)  | 0.000    | 0.71 (0.59-0.85) | 0.000    |
| Interaction between age and RAS status | 1.51 (1.32-1.73)  | 0.000    | 0.84 (0.65-1.08) | 0.164    |

CEA, carcinoembryonic antigen; T CI, confidence interval.

**Table S2.** Patient characteristics according to age group before and after IPTW.

|                                   |             | Before IPTW |            |           |          | After IPTW |            |            |          |
|-----------------------------------|-------------|-------------|------------|-----------|----------|------------|------------|------------|----------|
| Age Group                         |             | EOCRLM      | AOCRLM     | LOCRLM    | <i>p</i> | EOCRLM     | AOCRLM     | LOCRLM     | <i>p</i> |
| <b>n</b>                          |             | 162         | 930        | 97        |          | 162        | 162        | 158        |          |
| <b>gender</b>                     | female      | 59 (36.4)   | 323 (34.7) | 32 (33.0) | 0.848    | 59 (36.4)  | 59 (36.5)  | 56 (35.5)  | 0.959    |
|                                   | male        | 103(63.6)   | 607 (65.3) | 65 (67.0) |          | 103 (63.6) | 103 (63.5) | 102 (64.5) |          |
| <b>Primary tumor location</b>     | Left-sided  | 137 (84.6)  | 772 (83.0) | 73 (75.3) | 0.124    | 137 (84.6) | 137 (84.6) | 133 (84.3) | 0.992    |
|                                   | Right-sided | 25 (15.4)   | 158 (17.0) | 24 (24.7) |          | 25 (15.4)  | 25 (15.4)  | 25 (15.7)  |          |
| <b>T stage</b>                    | T1/T2       | 12 (7.4)    | 92 (9.9)   | 7 (7.2)   | 0.457    | 12 (7.4)   | 15 (9.3)   | 15 (9.5)   | 0.762    |
|                                   | T3/T4       | 150 (92.6)  | 838 (90.1) | 90 (92.8) |          | 150 (92.6) | 147 (90.7) | 143 (90.5) |          |
| <b>Lymph Node metastasis</b>      | No          | 41 (25.3)   | 276 (29.7) | 34 (35.1) | 0.244    | 41 (25.3)  | 41 (25.3)  | 47 (29.7)  | 0.579    |
|                                   | Yes         | 121 (74.7)  | 654 (70.3) | 63 (64.9) |          | 121 (74.7) | 121 (74.7) | 111 (70.3) |          |
| <b>RAS status (%)</b>             | Wild-type   | 97 (59.9)   | 572 (61.5) | 54 (55.7) | 0.516    | 97 (59.9)  | 96 (59.5)  | 104 (65.7) | 0.494    |
|                                   | mutated     | 65 (40.1)   | 358 (38.5) | 43 (44.3) |          | 65 (40.1)  | 66 (40.5)  | 54 (34.3)  |          |
| <b>BRAF status (%)</b>            | Wild-type   | 157 (96.9)  | 919 (98.8) | 96 (99.0) | 0.160    | 157 (96.9) | 160 (98.9) | 157 (99.4) | 0.177    |
|                                   | mutated     | 5 (3.1)     | 11 (1.2)   | 1 (1.0)   |          | 5 (3.1)    | 2 (1.1)    | 1 (0.6)    |          |
| <b>Preoperative chemotherapy</b>  | No          | 29 (17.9)   | 209 (22.5) | 37 (38.1) | 0.001    | 29 (17.9)  | 29 (17.9)  | 31 (19.6)  | 0.824    |
|                                   | Yes         | 133 (82.1)  | 721 (77.5) | 60 (61.9) |          | 133 (82.1) | 133 (82.1) | 127 (80.4) |          |
| <b>Synchronous metastases</b>     | No          | 54 (33.3)   | 360 (38.7) | 44 (45.4) | 0.152    | 54 (33.3)  | 56 (34.6)  | 73 (46.3)  | 0.101    |
|                                   | Yes         | 108 (66.7)  | 570 (61.3) | 53 (54.6) |          | 108 (66.7) | 106 (65.4) | 85 (53.7)  |          |
| <b>Bilateral liver disease</b>    | No          | 62 (38.3)   | 453 (48.7) | 58 (59.8) | 0.003    | 62 (38.3)  | 62 (38.3)  | 58 (36.7)  | 0.896    |
|                                   | Yes         | 100 (61.7)  | 477 (51.3) | 39 (40.2) |          | 100 (61.7) | 100 (61.7) | 100 (63.3) |          |
| <b>R1 resection</b>               | No          | 129 (79.6)  | 732 (78.7) | 80 (82.5) | 0.677    | 129 (79.6) | 129 (79.6) | 130 (82.3) | 0.798    |
|                                   | Yes         | 33 (20.4)   | 198 (21.3) | 17 (17.5) |          | 33 (20.4)  | 33 (20.4)  | 28 (17.7)  |          |
| <b>Red blood cell Transfusion</b> | No          | 145 (89.5)  | 873 (93.9) | 88 (90.7) | 0.086    | 145 (89.5) | 145 (89.5) | 145 (91.8) | 0.737    |
|                                   | Yes         | 17 (10.5)   | 57 (6.1)   | 9 (9.3)   |          | 17 (10.5)  | 17 (10.6)  | 13 (8.4)   |          |
| <b>&gt;1 liver metastasis</b>     | No          | 43 (26.5)   | 313 (33.7) | 42 (43.3) | 0.021    | 39 (24.1)  | 39 (24.1)  | 34 (21.5)  | 0.763    |
|                                   | Yes         | 119 (73.5)  | 617 (66.3) | 55 (56.7) |          | 123 (75.9) | 123 (75.9) | 124 (78.5) |          |
| <b>Extrahepatic disease</b>       | No          | 126 (77.8)  | 779 (83.8) | 82 (84.5) | 0.159    | 119 (73.5) | 119 (73.5) | 120 (76.0) | 0.799    |
|                                   | Yes         | 36 (22.2)   | 151 (16.2) | 15 (15.5) |          | 43 (26.5)  | 43 (26.5)  | 38 (24.0)  |          |
| <b>Maximum tumor size ≥ 5cm</b>   | No          | 103 (63.6)  | 524 (56.3) | 43 (44.3) | 0.010    | 126 (77.8) | 125 (77.4) | 132 (83.5) | 0.433    |
|                                   | Yes         | 59 (36.4)   | 406 (43.7) | 54 (55.7) |          | 36 (22.2)  | 37 (22.6)  | 26 (16.5)  |          |
| <b>CEA &gt;20 ng/dl</b>           | No          | 119 (73.5)  | 676 (72.7) | 67 (69.1) | 0.718    | 103 (63.6) | 103 (63.6) | 106 (67.1) | 0.744    |
|                                   | Yes         | 43 (26.5)   | 254 (27.3) | 30 (30.9) |          | 59 (36.4)  | 59 (36.4)  | 52 (32.9)  |          |
| <b>Adjuvant chemotherapy</b>      | No          | 39 (24.1)   | 238 (25.6) | 39 (40.2) | 0.006    | 43 (26.5)  | 42 (26.0)  | 44 (27.8)  | 0.921    |
|                                   | Yes         | 123 (75.9)  | 692 (74.4) | 58 (59.8) |          | 119(73.5)  | 120 (74.0) | 114 (72.2) |          |
| <b>Major resection</b>            | No          | 119 (73.5)  | 723 (77.7) | 85 (87.6) | 0.027    | 123 (75.9) | 123 (75.9) | 124(78.5)  | 0.763    |
|                                   | Yes         | 43 (26.5)   | 207 (22.3) | 12 (12.4) |          | 39 (24.1)  | 39 (24.1)  | 34 (21.5)  |          |

CEA, carcinoembryonic antigen.

**Table S3.** Univariate and multivariable Cox regression analysis of overall survival in the LOCRLM cohort.

|                              | Univariate       |          | Multivariate     |          |
|------------------------------|------------------|----------|------------------|----------|
|                              | HR (95% CI)      | <i>p</i> | HR (95% CI)      | <i>p</i> |
| Female gender                | 0.97 (0.54-1.74) | 0.909    |                  |          |
| Primary tumor location       |                  |          |                  |          |
| Left-sided primary           | Ref              |          |                  |          |
| Right-sided primary          | 1.14 (0.60-2.19) | 0.694    |                  |          |
| Primary tumor stage          |                  |          |                  |          |
| T1 & T2                      | Ref              |          |                  |          |
| T3 & T4                      | 1.83 (0.74-4.51) | 0.849    | -                |          |
| Lymph Node metastasis        | 1.81 (0.97-3.35) | 0.061    | 1.75 (0.93-3.31) | 0.084    |
| Preoperative chemotherapy    | 1.30 (0.74-2.29) | 0.360    |                  |          |
| CEA >20 ng/dl                | 1.93 (1.11-3.39) | 0.021    | 1.78 (0.99-3.17) | 0.054    |
| Synchronous liver metastases | 1.37 (0.79-2.39) | 0.268    | -                |          |
| >1 liver metastasis          | 1.58 (0.90-2.77) | 0.110    |                  |          |
| Maximum tumor size ≥ 5cm     | 1.70 (1.39-2.07) | 0.083    | 1.56 (0.84-2.92) | 0.159    |
| Bilateral liver disease      | 2.04 (1.16-3.60) | 0.014    | 2.49 (1.35-4.59) | 0.003    |
| RAS status                   |                  |          |                  |          |
| Wild-type tumors             | Ref              |          | Ref              |          |
| Mutated                      | 1.58 (0.92-2.74) | 0.098    | 1.38 (0.77-2.46) | 0.276    |
| BRAF status                  |                  |          |                  |          |
| Wild-type tumors             | Ref              |          |                  |          |
| Mutated                      | 1.00(0.00-267)   | 1.000    |                  |          |
| Extrahepatic disease         | 1.42 (0.68-2.95) | 0.346    |                  |          |
| Major resection              | 1.09 (0.49-2.44) | 0.838    |                  |          |
| Red Blood Cell Transfusion   | 2.01 (0.85-4.75) | 0.113    |                  |          |
| R1 resection                 | 1.64 (0.86-3.14) | 0.136    |                  |          |
| Adjuvant chemotherapy        | 1.07 (0.61-1.87) | 0.820    |                  |          |

**Table S4.** Univariate and multivariable Cox regression analysis of overall survival in the EOCRLM cohort.

|                              | Univariate        |          | Multivariate     |          |
|------------------------------|-------------------|----------|------------------|----------|
|                              | HR (95% CI)       | <i>p</i> | HR (95% CI)      | <i>p</i> |
| Female gender                | 0.73 (0.48-1.12)  | 0.148    |                  |          |
| Primary tumor location       |                   |          |                  |          |
| Left-sided primary           | Ref               |          |                  |          |
| Right-sided primary          | 1.20 (0.69-2.10)  | 0.516    |                  |          |
| Primary tumor stage          |                   |          |                  |          |
| T1 & T2                      | Ref               |          |                  |          |
| T3 & T4                      | 1.83 (0.74-4.51)  | 0.191    | -                |          |
| Lymph Node metastasis        | 1.98 (1.17-3.34)  | 0.011    | 2.00 (1.15-3.47) | 0.013    |
| Preoperative chemotherapy    | 1.16 (0.69-1.95)  | 0.585    |                  |          |
| CEA >20 ng/dl                | 1.53 (0.97-2.43)  | 0.070    | 1.45 (0.90-2.33) | 0.124    |
| Synchronous liver metastases | 1.10 (0.92-1.30.) | 0.202    | -                |          |
| >1 liver metastasis          | 1.77 (1.05-2.99)  | 0.031    | 1.40 (0.75-2.63) | 0.289    |
| Maximum tumor size ≥ 5cm     | 0.98 (0.64-1.52)  | 0.940    |                  |          |
| Bilateral liver disease      | 2.03 (1.28-3.22)  | 0.003    | 1.49 (0.85-2.59) | 0.163    |
| RAS status                   |                   |          |                  |          |
| Wild-type tumors             | Ref               |          | Ref              |          |
| Mutated                      | 2.00 (1.30-3.06)  | 0.001    | 1.95 (1.26-3.04) | 0.003    |
| BRAF status                  |                   |          |                  |          |

|                            |                  |       |                   |       |
|----------------------------|------------------|-------|-------------------|-------|
| Wild-type tumors           | Ref              |       |                   |       |
| Mutated                    | 0.05(0.00-73.5)  | 0.417 |                   |       |
| Extrahepatic disease       | 1.66 (1.03-2.69) | 0.038 | 1.86 (1.13 -3.08) | 0.015 |
| Major resection            | 1.06 (0.66-1.72) | 0.807 |                   |       |
| Red Blood Cell Transfusion | 1.31 (0.69-2.46) | 0.408 |                   |       |
| R1 resection               | 1.43 (0.88-2.32) | 0.147 |                   |       |
| Adjuvant chemotherapy      | 0.62 (0.39-0.99) | 0.043 | 0.71 (0.44-1.14)  | 0.015 |

**Table S5.** Univariate and multivariable Cox regression analysis of overall survival in the iOCRLM cohort.

|                              | Univariate       |          | Multivariate     |          |
|------------------------------|------------------|----------|------------------|----------|
|                              | HR (95% CI)      | <i>p</i> | HR (95% CI)      | <i>p</i> |
| Female gender                | 0.80 (0.66-0.98) | 0.034    | 0.84 (0.68-1.03) | 0.098    |
| Primary tumor location       |                  |          |                  |          |
| Left-sided primary           | Ref              |          |                  |          |
| Right-sided primary          | 1.41 (1.10-1.79) | 0.006    | 1.16 (0.91-1.50) | 0.235    |
| Primary tumor stage          |                  |          |                  |          |
| T1 & T2                      | Ref              |          |                  |          |
| T3 & T4                      | 1.10 (0.78-1.54) | 0.605    | -                |          |
| Lymph Node metastasis        | 1.26 (1.01-1.58) | 0.038    | 1.11 (0.88-1.39) | 0.379    |
| Preoperative chemotherapy    | 1.08 (0.85-1.36) | 0.534    |                  |          |
| CEA >20 ng/dl                | 1.77 (1.44-2.17) | 0.000    | 1.50 (1.21-1.85) | 0.000    |
| Synchronous liver metastases | 1.02 (0.83-1.25) | 0.856    | -                |          |
| >1 liver metastasis          | 1.36 (1.10-1.68) | 0.005    | 1.34 (1.00-1.78) | 0.047    |
| Maximum tumor size ≥ 5cm     | 1.70 (1.39-2.07) | 0.000    | 1.54 (1.25-1.90) | 0.000    |
| Bilateral liver disease      | 1.21 (0.99-1.47) | 0.065    | 0.98 (0.75-1.27) | 0.864    |
| RAS status                   |                  |          |                  |          |
| Wild-type tumors             | Ref              |          | Ref              |          |
| Mutated                      | 1.96 (1.61-2.40) | 0.000    | 1.90 (1.55-2.33) | 0.000    |
| BRAF status                  |                  |          |                  |          |
| Wild-type tumors             | Ref              |          |                  |          |
| Mutated                      | 1.17(0.38-3.65)  | 0.768    |                  |          |
| Extrahepatic disease         | 1.95 (1.53-2.50) | 0.000    | 2.03 (1.58-2.61) | 0.000    |
| Major resection              | 1.65 (1.32-2.06) | 0.000    | 1.40 (1.11-1.77) | 0.004    |
| Red Blood Cell Transfusion   | 1.40 (0.99-1.97) | 0.055    | 1.03 (0.72-1.48) | 0.871    |
| R1 resection                 | 1.24 (0.99-1.56) | 0.056    | 1.25 (0.99-1.58) | 0.058    |
| Adjuvant chemotherapy        | 0.64 (0.52-0.79) | 0.000    | 0.65 (0.53-0.82) | 0.000    |

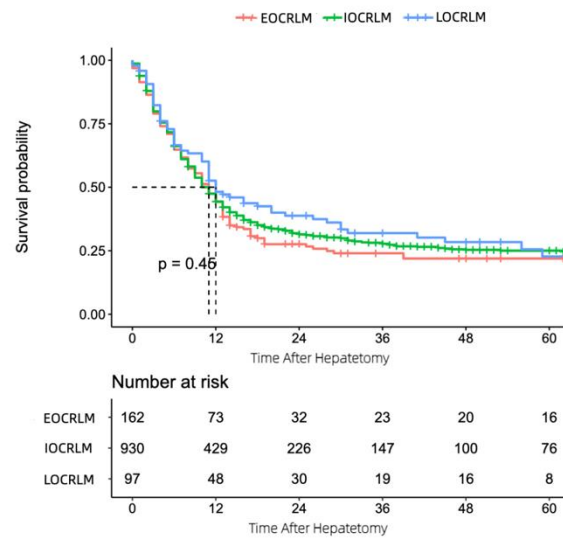

**Figure S1.** Kaplan–Meier estimates of disease-free survival stratified by age groups in the whole cohort.

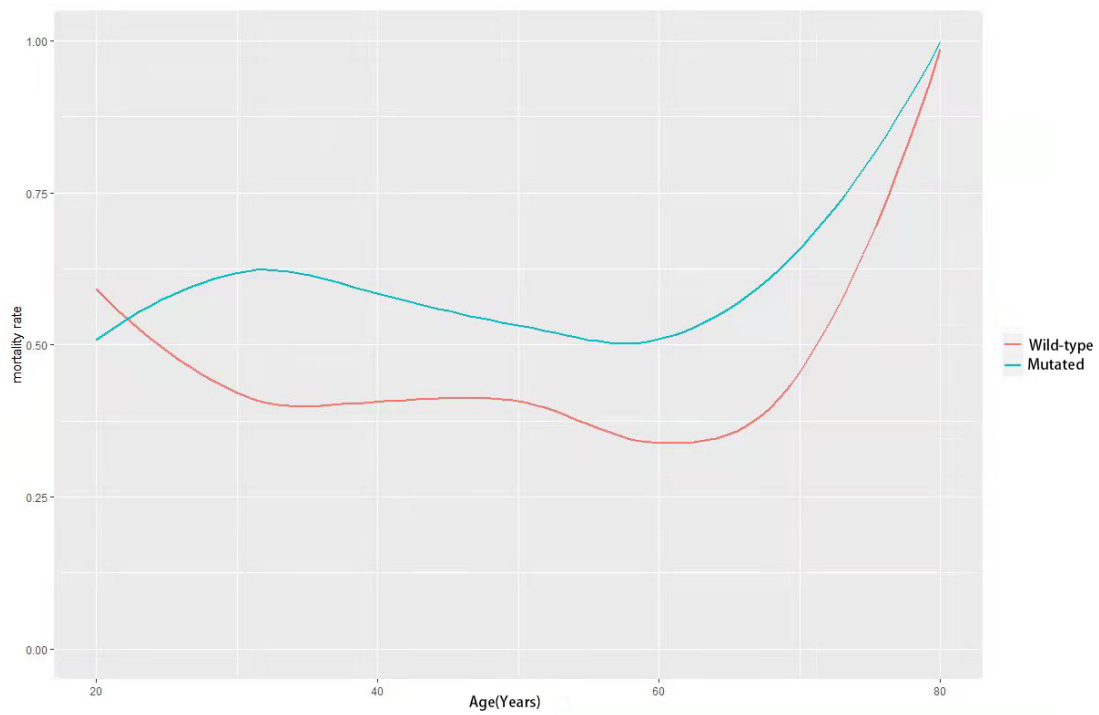

**Figure S2.** The age-specific mortality risk by RAS status.

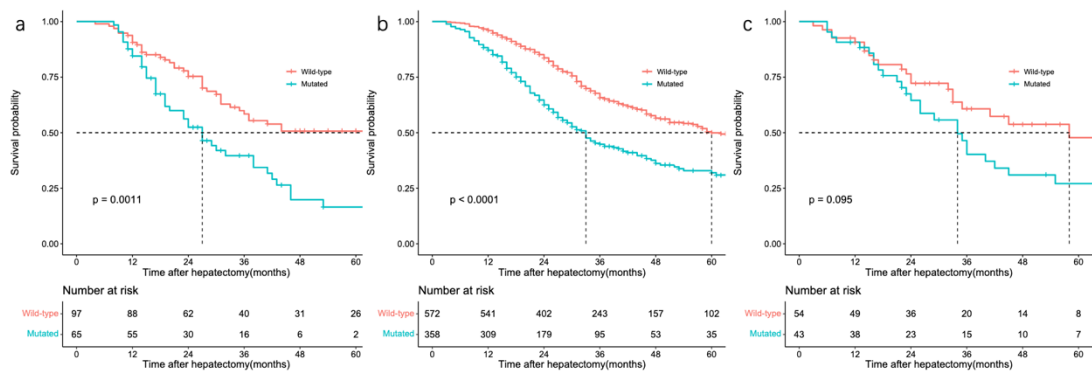

**Figure S3.** Survival analysis according to the RAS stratification a, b and c: Kaplan–Meier curves of the EOCRLM group patients(a), IOCRLM group(b) and LOCRLM group(c) stratified by the RAS status.
